# Supplementary material
Source: PubMed Central journal article supplement (PMC7554226)
Supplement: NIHMS1619713-supplement-Online_Table_IV.pdf [file NIHMS1619713-supplement-Online_Table_IV.pdf]

# Homer Known Motif Enrichment Results (Strong\_novel\_embryonic\_heart\_enhancers)

[Homer de novo Motif Results](#)

[Gene Ontology Enrichment Results](#)

[Known Motif Enrichment Results \(txt file\)](#)

Total Target Sequences = 9091, Total Background Sequences = 41272

| Rank | Motif                                                                              | Name                                                  | P-value | log P-value | q-value (Benjamini) | # Target Sequences with Motif | % of Targets Sequences with Motif | # Background Sequences with Motif | % of Background Sequences with Motif | Motif File                          | SVG                 |
|------|------------------------------------------------------------------------------------|-------------------------------------------------------|---------|-------------|---------------------|-------------------------------|-----------------------------------|-----------------------------------|--------------------------------------|-------------------------------------|---------------------|
| 1    |    | Mef2d(MADS)/Retina-Mef2d-ChIP-Seq(GSE61391)/Homer     | 1e-59   | -1.374e+02  | 0.0000              | 890.0                         | 9.79%                             | 2261.7                            | 5.48%                                | <a href="#">motif file (matrix)</a> | <a href="#">svg</a> |
| 2    |    | Mef2c(MADS)/GM12878-Mef2c-ChIP-Seq(GSE32465)/Homer    | 1e-48   | -1.114e+02  | 0.0000              | 1697.0                        | 18.66%                            | 5441.2                            | 13.18%                               | <a href="#">motif file (matrix)</a> | <a href="#">svg</a> |
| 3    |    | Gata1(Zf)/K562-GATA1-ChIP-Seq(GSE18829)/Homer         | 1e-35   | -8.144e+01  | 0.0000              | 1917.0                        | 21.08%                            | 6641.8                            | 16.08%                               | <a href="#">motif file (matrix)</a> | <a href="#">svg</a> |
| 4    |    | Gata6(Zf)/HUG1N-GATA6-ChIP-Seq(GSE51936)/Homer        | 1e-34   | -8.024e+01  | 0.0000              | 2850.0                        | 31.34%                            | 10547.4                           | 25.54%                               | <a href="#">motif file (matrix)</a> | <a href="#">svg</a> |
| 5    |    | Gata2(Zf)/K562-GATA2-ChIP-Seq(GSE18829)/Homer         | 1e-33   | -7.627e+01  | 0.0000              | 2106.0                        | 23.16%                            | 7482.8                            | 18.12%                               | <a href="#">motif file (matrix)</a> | <a href="#">svg</a> |
| 6    |    | NF1(CTF)/LNCAP-NF1-ChIP-Seq(Unpublished)/Homer        | 1e-32   | -7.540e+01  | 0.0000              | 1122.0                        | 12.34%                            | 3551.7                            | 8.60%                                | <a href="#">motif file (matrix)</a> | <a href="#">svg</a> |
| 7    |    | Gata4(Zf)/Heart-Gata4-ChIP-Seq(GSE35151)/Homer        | 1e-31   | -7.255e+01  | 0.0000              | 3025.0                        | 33.27%                            | 11414.4                           | 27.64%                               | <a href="#">motif file (matrix)</a> | <a href="#">svg</a> |
| 8    |    | Mef2b(MADS)/HEK293-Mef2b.V5-ChIP-Seq(GSE67450)/Homer  | 1e-30   | -7.062e+01  | 0.0000              | 2660.0                        | 29.25%                            | 9885.1                            | 23.94%                               | <a href="#">motif file (matrix)</a> | <a href="#">svg</a> |
| 9    |   | Mef2a(MADS)/HL1-Mef2a.biotin-ChIP-Seq(GSE21529)/Homer | 1e-23   | -5.492e+01  | 0.0000              | 1474.0                        | 16.21%                            | 5178.6                            | 12.54%                               | <a href="#">motif file (matrix)</a> | <a href="#">svg</a> |
| 10   |  | Tbx20(T-box)/Heart-Tbx20-ChIP-Seq(GSE29636)/Homer     | 1e-21   | -5.054e+01  | 0.0000              | 708.0                         | 7.79%                             | 2205.1                            | 5.34%                                | <a href="#">motif file (matrix)</a> | <a href="#">svg</a> |
| 11   |  | Tlx?(NR)/NPC-H3K4me1-ChIP-Seq(GSE16256)/Homer         | 1e-20   | -4.813e+01  | 0.0000              | 1152.0                        | 12.67%                            | 3967.3                            | 9.61%                                | <a href="#">motif file (matrix)</a> | <a href="#">svg</a> |
| 12   |  | GATA3(Zf)/iTreg-Gata3-ChIP-Seq(GSE20898)/Homer        | 1e-16   | -3.805e+01  | 0.0000              | 4005.0                        | 44.04%                            | 16403.4                           | 39.72%                               | <a href="#">motif file (matrix)</a> | <a href="#">svg</a> |
| 13   |  | Esrrb(NR)/mES-Esrrb-ChIP-Seq(GSE11431)/Homer          | 1e-13   | -3.117e+01  | 0.0000              | 1590.0                        | 17.49%                            | 6040.3                            | 14.63%                               | <a href="#">motif file (matrix)</a> | <a href="#">svg</a> |
| 14   |  | ERRg(NR)/Kidney-ESRRG-ChIP-Seq(GSE104905)/Homer       | 1e-10   | -2.515e+01  | 0.0000              | 1940.0                        | 21.34%                            | 7663.7                            | 18.56%                               | <a href="#">motif file (matrix)</a> | <a href="#">svg</a> |
| 15   |  | TEAD(TEA)/Fibroblast-PU.1-ChIP-Seq(Unpublished)/Homer | 1e-10   | -2.422e+01  | 0.0000              | 1938.0                        | 21.31%                            | 7677.6                            | 18.59%                               | <a href="#">motif file (matrix)</a> | <a href="#">svg</a> |
| 16   |  | TEAD4(TEA)/Tropoblast-Tead4-ChIP-Seq(GSE37350)/Homer  | 1e-9    | -2.295e+01  | 0.0000              | 2160.0                        | 23.75%                            | 8670.6                            | 21.00%                               | <a href="#">motif file (matrix)</a> | <a href="#">svg</a> |
| 17   |                                                                                    | Hand2(bHLH)/Mesoderm-Hand2-ChIP-Seq(GSE61475)/Homer   | 1e-9    | -2.164e+01  | 0.0000              | 1305.0                        | 14.35%                            | 5033.9                            | 12.19%                               | <a href="#">motif file</a>          | <a href="#">svg</a> |

|    |                                                                                    |                                                                  |      |            |        |        |        |         |        |                                                        |                          |  |
|----|------------------------------------------------------------------------------------|------------------------------------------------------------------|------|------------|--------|--------|--------|---------|--------|--------------------------------------------------------|--------------------------|--|
|    |       |                                                                  |      |            |        |        |        |         |        |                                                        | <a href="#">(matrix)</a> |  |
| 18 |     | TEAD1(TEAD)/HepG2-TEAD1-ChIP-Seq(Encode)/Homer                   | 1e-9 | -2.135e+01 | 0.0000 | 2551.0 | 28.05% | 10422.9 | 25.24% | <a href="#">motif file</a><br><a href="#">(matrix)</a> | <a href="#">svg</a>      |  |
| 19 |    | TEAD2(TEA)/Py2T-Tead2-ChIP-Seq(GSE55709)/Homer                   | 1e-9 | -2.074e+01 | 0.0000 | 1406.0 | 15.46% | 5482.8  | 13.28% | <a href="#">motif file</a><br><a href="#">(matrix)</a> | <a href="#">svg</a>      |  |
| 20 |    | Brachyury(T-box)/Mesoendoderm-Brachyury-ChIP-exo(GSE54963)/Homer | 1e-8 | -1.979e+01 | 0.0000 | 728.0  | 8.01%  | 2662.0  | 6.45%  | <a href="#">motif file</a><br><a href="#">(matrix)</a> | <a href="#">svg</a>      |  |
| 21 |    | TRPS1(Zf)/MCF7-TRPS1-ChIP-Seq(GSE107013)/Homer                   | 1e-8 | -1.913e+01 | 0.0000 | 4909.0 | 53.99% | 21050.2 | 50.98% | <a href="#">motif file</a><br><a href="#">(matrix)</a> | <a href="#">svg</a>      |  |
| 22 |    | TEAD3(TEA)/HepG2-TEAD3-ChIP-Seq(Encode)/Homer                    | 1e-7 | -1.764e+01 | 0.0000 | 2880.0 | 31.67% | 11991.1 | 29.04% | <a href="#">motif file</a><br><a href="#">(matrix)</a> | <a href="#">svg</a>      |  |
| 23 |    | GATA:SCL(Zf,bHLH)/Ter119-SCL-ChIP-Seq(GSE18720)/Homer            | 1e-6 | -1.589e+01 | 0.0000 | 353.0  | 3.88%  | 1207.3  | 2.92%  | <a href="#">motif file</a><br><a href="#">(matrix)</a> | <a href="#">svg</a>      |  |
| 24 |    | Meis1(Homeobox)/MastCells-Meis1-ChIP-Seq(GSE48085)/Homer         | 1e-6 | -1.452e+01 | 0.0000 | 3600.0 | 39.59% | 15318.9 | 37.10% | <a href="#">motif file</a><br><a href="#">(matrix)</a> | <a href="#">svg</a>      |  |
| 25 |    | Zfp809(Zf)/ES-Zfp809-ChIP-Seq(GSE70799)/Homer                    | 1e-5 | -1.315e+01 | 0.0000 | 492.0  | 5.41%  | 1809.5  | 4.38%  | <a href="#">motif file</a><br><a href="#">(matrix)</a> | <a href="#">svg</a>      |  |
| 26 |    | SF1(NR)/H295R-Nr5a1-ChIP-Seq(GSE44220)/Homer                     | 1e-5 | -1.239e+01 | 0.0001 | 1039.0 | 11.43% | 4126.3  | 9.99%  | <a href="#">motif file</a><br><a href="#">(matrix)</a> | <a href="#">svg</a>      |  |
| 27 |    | Nur77(NR)/K562-NR4A1-ChIP-Seq(GSE31363)/Homer                    | 1e-4 | -1.129e+01 | 0.0002 | 528.0  | 5.81%  | 1993.4  | 4.83%  | <a href="#">motif file</a><br><a href="#">(matrix)</a> | <a href="#">svg</a>      |  |
| 28 |    | Pbx3(Homeobox)/GM12878-PBX3-ChIP-Seq(GSE32465)/Homer             | 1e-4 | -1.124e+01 | 0.0002 | 581.0  | 6.39%  | 2215.2  | 5.36%  | <a href="#">motif file</a><br><a href="#">(matrix)</a> | <a href="#">svg</a>      |  |
| 29 |    | ZNF322(Zf)/HEK293-ZNF322.GFP-ChIP-Seq(GSE58341)/Homer            | 1e-4 | -1.025e+01 | 0.0005 | 666.0  | 7.32%  | 2595.8  | 6.29%  | <a href="#">motif file</a><br><a href="#">(matrix)</a> | <a href="#">svg</a>      |  |
| 30 |    | PBX2(Homeobox)/K562-PBX2-ChIP-Seq(Encode)/Homer                  | 1e-4 | -1.011e+01 | 0.0006 | 2234.0 | 24.57% | 9421.1  | 22.81% | <a href="#">motif file</a><br><a href="#">(matrix)</a> | <a href="#">svg</a>      |  |
| 31 |    | CArG(MADS)/PUER-Srf-ChIP-Seq(Sullivan_et_al.)/Homer              | 1e-4 | -9.770e+00 | 0.0008 | 812.0  | 8.93%  | 3228.7  | 7.82%  | <a href="#">motif file</a><br><a href="#">(matrix)</a> | <a href="#">svg</a>      |  |
| 32 |   | Nr5a2(NR)/Pancreas-LRH1-ChIP-Seq(GSE34295)/Homer                 | 1e-4 | -9.377e+00 | 0.0011 | 1605.0 | 17.65% | 6680.1  | 16.18% | <a href="#">motif file</a><br><a href="#">(matrix)</a> | <a href="#">svg</a>      |  |
| 33 |  | Foxo3(Forkhead)/U2OS-Foxo3-ChIP-Seq(E-MTAB-2701)/Homer           | 1e-4 | -9.352e+00 | 0.0011 | 1980.0 | 21.77% | 8331.8  | 20.18% | <a href="#">motif file</a><br><a href="#">(matrix)</a> | <a href="#">svg</a>      |  |
| 34 |  | Rfx6(HTH)/Min6b1-Rfx6.HA-ChIP-Seq(GSE62844)/Homer                | 1e-3 | -8.857e+00 | 0.0018 | 2314.0 | 25.45% | 9832.6  | 23.81% | <a href="#">motif file</a><br><a href="#">(matrix)</a> | <a href="#">svg</a>      |  |
| 35 |  | VDR(NR),DR3/GM10855-VDR+vitD-ChIP-Seq(GSE22484)/Homer            | 1e-3 | -8.621e+00 | 0.0022 | 490.0  | 5.39%  | 1892.2  | 4.58%  | <a href="#">motif file</a><br><a href="#">(matrix)</a> | <a href="#">svg</a>      |  |
| 36 |  | Nr5a2(NR)/mES-Nr5a2-ChIP-Seq(GSE19019)/Homer                     | 1e-3 | -8.216e+00 | 0.0032 | 1180.0 | 12.98% | 4867.1  | 11.79% | <a href="#">motif file</a><br><a href="#">(matrix)</a> | <a href="#">svg</a>      |  |
| 37 |                                                                                    | Hoxa10(Homeobox)/ChickenMSG-Hoxa10.Flag-ChIP-                    | 1e-3 | -8.031e+00 | 0.0038 | 1703.0 | 18.73% | 7167.4  | 17.36% | <a href="#">motif file</a>                             | <a href="#">svg</a>      |  |

|    |  |                                                                     |      |            |        |        |        |         |        |                                     |                          |  |
|----|--|---------------------------------------------------------------------|------|------------|--------|--------|--------|---------|--------|-------------------------------------|--------------------------|--|
|    |  | Seq(GSE86088)/Homer                                                 |      |            |        |        |        |         |        |                                     | <a href="#">(matrix)</a> |  |
| 38 |  | Pitx1:Ebobox(Homeobox,bHLH)/Hindlimb-Pitx1-ChIP-Seq(GSE41591)/Homer | 1e-3 | -8.022e+00 | 0.0038 | 619.0  | 6.81%  | 2453.6  | 5.94%  | <a href="#">motif file (matrix)</a> | <a href="#">svg</a>      |  |
| 39 |  | Tbox:Smad(T-box,MAD)/ESCd5-Smad2_3-ChIP-Seq(GSE29422)/Homer         | 1e-3 | -7.984e+00 | 0.0038 | 426.0  | 4.68%  | 1638.9  | 3.97%  | <a href="#">motif file (matrix)</a> | <a href="#">svg</a>      |  |
| 40 |  | Tbx21(T-box)/GM12878-TBX21-ChIP-Seq(Encode)/Homer                   | 1e-3 | -7.359e+00 | 0.0068 | 2510.0 | 27.60% | 10780.1 | 26.11% | <a href="#">motif file (matrix)</a> | <a href="#">svg</a>      |  |
| 41 |  | LEF1(HMG)/H1-LEF1-ChIP-Seq(GSE64758)/Homer                          | 1e-3 | -7.295e+00 | 0.0071 | 1802.0 | 19.82% | 7638.5  | 18.50% | <a href="#">motif file (matrix)</a> | <a href="#">svg</a>      |  |
| 42 |  | Brn2(POU,Homeobox)/NPC-Brn2-ChIP-Seq(GSE35496)/Homer                | 1e-3 | -7.271e+00 | 0.0071 | 345.0  | 3.79%  | 1315.9  | 3.19%  | <a href="#">motif file (matrix)</a> | <a href="#">svg</a>      |  |
| 43 |  | ERE(NR),IR3/MCF7-ERa-ChIP-Seq(Unpublished)/Homer                    | 1e-3 | -7.214e+00 | 0.0073 | 583.0  | 6.41%  | 2322.7  | 5.62%  | <a href="#">motif file (matrix)</a> | <a href="#">svg</a>      |  |
| 44 |  | MafA(bZIP)/Islet-MafA-ChIP-Seq(GSE30298)/Homer                      | 1e-3 | -7.210e+00 | 0.0073 | 1771.0 | 19.48% | 7505.0  | 18.17% | <a href="#">motif file (matrix)</a> | <a href="#">svg</a>      |  |
| 45 |  | Oct2(POU,Homeobox)/Bcell-Oct2-ChIP-Seq(GSE21512)/Homer              | 1e-3 | -7.126e+00 | 0.0076 | 901.0  | 9.91%  | 3694.7  | 8.95%  | <a href="#">motif file (matrix)</a> | <a href="#">svg</a>      |  |
| 46 |  | Six1(Homeobox)/Myoblast-Six1-ChIP-Chip(GSE20150)/Homer              | 1e-3 | -7.103e+00 | 0.0077 | 608.0  | 6.69%  | 2432.5  | 5.89%  | <a href="#">motif file (matrix)</a> | <a href="#">svg</a>      |  |
| 47 |  | Tcf7(HMG)/GM12878-TCF7-ChIP-Seq(Encode)/Homer                       | 1e-3 | -6.994e+00 | 0.0084 | 893.0  | 9.82%  | 3664.3  | 8.87%  | <a href="#">motif file (matrix)</a> | <a href="#">svg</a>      |  |
| 48 |  | FOXP1(Forkhead)/H9-FOXP1-ChIP-Seq(GSE31006)/Homer                   | 1e-2 | -6.711e+00 | 0.0109 | 1129.0 | 12.42% | 4703.6  | 11.39% | <a href="#">motif file (matrix)</a> | <a href="#">svg</a>      |  |
| 49 |  | TCFL2(HMG)/K562-TCF7L2-ChIP-Seq(GSE29196)/Homer                     | 1e-2 | -6.590e+00 | 0.0120 | 218.0  | 2.40%  | 804.0   | 1.95%  | <a href="#">motif file (matrix)</a> | <a href="#">svg</a>      |  |
| 50 |  | Usf2(bHLH)/C2C12-Usf2-ChIP-Seq(GSE36030)/Homer                      | 1e-2 | -6.587e+00 | 0.0120 | 568.0  | 6.25%  | 2276.4  | 5.51%  | <a href="#">motif file (matrix)</a> | <a href="#">svg</a>      |  |
| 51 |  | FoxL2(Forkhead)/Ovary-FoxL2-ChIP-Seq(GSE60858)/Homer                | 1e-2 | -6.583e+00 | 0.0120 | 2264.0 | 24.90% | 9726.5  | 23.55% | <a href="#">motif file (matrix)</a> | <a href="#">svg</a>      |  |
| 52 |  | Stat3(Stat)/mES-Stat3-ChIP-Seq(GSE11431)/Homer                      | 1e-2 | -6.531e+00 | 0.0120 | 1191.0 | 13.10% | 4982.0  | 12.06% | <a href="#">motif file (matrix)</a> | <a href="#">svg</a>      |  |
| 53 |  | Smad2(MAD)/ES-SMAD2-ChIP-Seq(GSE29422)/Homer                        | 1e-2 | -6.450e+00 | 0.0128 | 3018.0 | 33.19% | 13106.2 | 31.74% | <a href="#">motif file (matrix)</a> | <a href="#">svg</a>      |  |
| 54 |  | CLOCK(bHLH)/Liver-Clock-ChIP-Seq(GSE39860)/Homer                    | 1e-2 | -6.447e+00 | 0.0128 | 927.0  | 10.19% | 3832.5  | 9.28%  | <a href="#">motif file (matrix)</a> | <a href="#">svg</a>      |  |
| 55 |  | Oct4:Sox17(POU,Homeobox,HMG)/F9-Sox17-ChIP-Seq(GSE44553)/Homer      | 1e-2 | -6.259e+00 | 0.0149 | 410.0  | 4.51%  | 1612.8  | 3.91%  | <a href="#">motif file (matrix)</a> | <a href="#">svg</a>      |  |
| 56 |  | MYB(HTH)/ERMYB-Myb-ChIPSeq(GSE22095)/Homer                          | 1e-2 | -6.095e+00 | 0.0172 | 3611.0 | 39.71% | 15797.4 | 38.26% | <a href="#">motif file (matrix)</a> | <a href="#">svg</a>      |  |
| 57 |  | DUX4(Homeobox)/Myoblasts-DUX4.V5-ChIP-Seq(GSE75791)/Homer           | 1e-2 | -6.017e+00 | 0.0183 | 151.0  | 1.66%  | 540.6   | 1.31%  | <a href="#">motif file</a>          | <a href="#">svg</a>      |  |

|    |  |                                                                          |      |            |        |        |        |         |        |                                     |                          |  |
|----|--|--------------------------------------------------------------------------|------|------------|--------|--------|--------|---------|--------|-------------------------------------|--------------------------|--|
|    |  |                                                                          |      |            |        |        |        |         |        |                                     | <a href="#">(matrix)</a> |  |
| 58 |  | Pknox1(Homeobox)/ES-Prep1-ChIP-Seq(GSE63282)/Homer                       | 1e-2 | -5.984e+00 | 0.0186 | 536.0  | 5.89%  | 2157.3  | 5.22%  | <a href="#">motif file (matrix)</a> | <a href="#">svg</a>      |  |
| 59 |  | MITF(bHLH)/MastCells-MITF-ChIP-Seq(GSE48085)/Homer                       | 1e-2 | -5.964e+00 | 0.0186 | 1805.0 | 19.85% | 7720.0  | 18.70% | <a href="#">motif file (matrix)</a> | <a href="#">svg</a>      |  |
| 60 |  | Foxf1(Forkhead)/Lung-Foxf1-ChIP-Seq(GSE77951)/Homer                      | 1e-2 | -5.917e+00 | 0.0192 | 2463.0 | 27.09% | 10653.6 | 25.80% | <a href="#">motif file (matrix)</a> | <a href="#">svg</a>      |  |
| 61 |  | bHLHE40(bHLH)/HepG2-BHLHE40-ChIP-Seq(GSE31477)/Homer                     | 1e-2 | -5.863e+00 | 0.0199 | 477.0  | 5.25%  | 1908.8  | 4.62%  | <a href="#">motif file (matrix)</a> | <a href="#">svg</a>      |  |
| 62 |  | Gfi1b(Zf)/HPC7-Gfi1b-ChIP-Seq(GSE22178)/Homer                            | 1e-2 | -5.851e+00 | 0.0199 | 1585.0 | 17.43% | 6750.2  | 16.35% | <a href="#">motif file (matrix)</a> | <a href="#">svg</a>      |  |
| 63 |  | Bel11a(Zf)/HSPC-BCL11A-ChIP-Seq(GSE104676)/Homer                         | 1e-2 | -5.842e+00 | 0.0199 | 1675.0 | 18.42% | 7149.5  | 17.31% | <a href="#">motif file (matrix)</a> | <a href="#">svg</a>      |  |
| 64 |  | PAX5(Paired,Homeobox)/GM12878-PAX5-ChIP-Seq(GSE32465)/Homer              | 1e-2 | -5.729e+00 | 0.0217 | 725.0  | 7.97%  | 2981.1  | 7.22%  | <a href="#">motif file (matrix)</a> | <a href="#">svg</a>      |  |
| 65 |  | Cux2(Homeobox)/Liver-Cux2-ChIP-Seq(GSE35985)/Homer                       | 1e-2 | -5.652e+00 | 0.0231 | 1198.0 | 13.17% | 5052.4  | 12.24% | <a href="#">motif file (matrix)</a> | <a href="#">svg</a>      |  |
| 66 |  | PRDM14(Zf)/H1-PRDM14-ChIP-Seq(GSE22767)/Homer                            | 1e-2 | -5.557e+00 | 0.0250 | 724.0  | 7.96%  | 2983.7  | 7.23%  | <a href="#">motif file (matrix)</a> | <a href="#">svg</a>      |  |
| 67 |  | ZNF165(Zf)/WHIM12-ZNF165-ChIP-Seq(GSE65937)/Homer                        | 1e-2 | -5.548e+00 | 0.0250 | 285.0  | 3.13%  | 1102.1  | 2.67%  | <a href="#">motif file (matrix)</a> | <a href="#">svg</a>      |  |
| 68 |  | ZNF317(Zf)/HEK293-ZNF317.GFP-ChIP-Seq(GSE58341)/Homer                    | 1e-2 | -5.448e+00 | 0.0271 | 222.0  | 2.44%  | 841.4   | 2.04%  | <a href="#">motif file (matrix)</a> | <a href="#">svg</a>      |  |
| 69 |  | PAX3:FKHR-fusion(Paired,Homeobox)/Rh4-PAX3:FKHR-ChIP-Seq(GSE19063)/Homer | 1e-2 | -5.378e+00 | 0.0286 | 539.0  | 5.93%  | 2189.2  | 5.30%  | <a href="#">motif file (matrix)</a> | <a href="#">svg</a>      |  |
| 70 |  | MafF(bZIP)/HepG2-MafF-ChIP-Seq(GSE31477)/Homer                           | 1e-2 | -5.351e+00 | 0.0290 | 848.0  | 9.33%  | 3531.1  | 8.55%  | <a href="#">motif file (matrix)</a> | <a href="#">svg</a>      |  |
| 71 |  | HRE(HSF)/HepG2-HSF1-ChIP-Seq(GSE31477)/Homer                             | 1e-2 | -5.339e+00 | 0.0290 | 376.0  | 4.14%  | 1492.3  | 3.61%  | <a href="#">motif file (matrix)</a> | <a href="#">svg</a>      |  |
| 72 |  | GATA(Zf),IR4/iTreg-Gata3-ChIP-Seq(GSE20898)/Homer                        | 1e-2 | -5.223e+00 | 0.0321 | 236.0  | 2.60%  | 904.4   | 2.19%  | <a href="#">motif file (matrix)</a> | <a href="#">svg</a>      |  |
| 73 |  | Tbx6(T-box)/ESC-Tbx6-ChIP-Seq(GSE93524)/Homer                            | 1e-2 | -5.212e+00 | 0.0321 | 2591.0 | 28.49% | 11271.6 | 27.30% | <a href="#">motif file (matrix)</a> | <a href="#">svg</a>      |  |
| 74 |  | Reverb(NR),DR2/RAW-Reverba.biotin-ChIP-Seq(GSE45914)/Homer               | 1e-2 | -5.104e+00 | 0.0351 | 301.0  | 3.31%  | 1180.0  | 2.86%  | <a href="#">motif file (matrix)</a> | <a href="#">svg</a>      |  |
| 75 |  | Pit1+1bp(Homeobox)/GCrat-Pit1-ChIP-Seq(GSE58009)/Homer                   | 1e-2 | -5.043e+00 | 0.0369 | 1128.0 | 12.41% | 4773.6  | 11.56% | <a href="#">motif file (matrix)</a> | <a href="#">svg</a>      |  |
| 76 |  | ZNF136(Zf)/HEK293-ZNF136.GFP-ChIP-Seq(GSE58341)/Homer                    | 1e-2 | -5.036e+00 | 0.0369 | 266.0  | 2.93%  | 1034.8  | 2.51%  | <a href="#">motif file (matrix)</a> | <a href="#">svg</a>      |  |
| 77 |  | Otx2(Homeobox)/EpiLC-Otx2-ChIP-                                          | 1e-2 | -5.031e+00 | 0.0369 | 1944.0 | 21.38% | 8391.9  | 20.32% | <a href="#">motif</a>               | <a href="#">svg</a>      |  |

|    |                                                                                  |                                                              |      |            |        |        |        |        |        |                                     |                     |
|----|----------------------------------------------------------------------------------|--------------------------------------------------------------|------|------------|--------|--------|--------|--------|--------|-------------------------------------|---------------------|
|    |     | Seq(GSE56098)/Homer                                          |      |            |        |        |        |        |        | <a href="#">file (matrix)</a>       |                     |
| 78 |   | Max(bHLH)/K562-Max-ChIP-Seq(GSE31477)/Homer                  | 1e-2 | -4.991e+00 | 0.0373 | 1251.0 | 13.76% | 5318.1 | 12.88% | <a href="#">motif file (matrix)</a> | <a href="#">svg</a> |
| 79 |  | NF1:FOXA1(CTF,Forkhead)/LNCAP-FOXA1-ChIP-Seq(GSE27824)/Homer | 1e-2 | -4.978e+00 | 0.0373 | 171.0  | 1.88%  | 639.8  | 1.55%  | <a href="#">motif file (matrix)</a> | <a href="#">svg</a> |
| 80 |  | NPAS2(bHLH)/Liver-NPAS2-ChIP-Seq(GSE39860)/Homer             | 1e-2 | -4.668e+00 | 0.0502 | 2127.0 | 23.39% | 9231.3 | 22.36% | <a href="#">motif file (matrix)</a> | <a href="#">svg</a> |
| 81 |  | THRb(NR)/HepG2-THRb.Flag-ChIP-Seq(Encode)/Homer              | 1e-2 | -4.642e+00 | 0.0509 | 1205.0 | 13.25% | 5133.3 | 12.43% | <a href="#">motif file (matrix)</a> | <a href="#">svg</a> |
| 82 |  | ZNF675(Zf)/HEK293-ZNF675.GFP-ChIP-Seq(GSE58341)/Homer        | 1e-2 | -4.621e+00 | 0.0514 | 385.0  | 4.23%  | 1551.6 | 3.76%  | <a href="#">motif file (matrix)</a> | <a href="#">svg</a> |

# Homer *de novo* Motif Results (Strong\_novel\_embryonic\_heart\_enhancers/)

[Known Motif Enrichment Results](#)

[Gene Ontology Enrichment Results](#)

If Homer is having trouble matching a motif to a known motif, try copy/pasting the matrix file into [STAMP](#)

More information on motif finding results: [HOMER](#) | [Description of Results](#) | [Tips](#)

Total target sequences = 9094

Total background sequences = 41303

\* - possible false positive

| Rank | Motif | P-value | log P-value | % of Targets | % of Background | STD(Bg STD)       | Best Match/Details                                                                                                                                 | Motif File                          |
|------|-------|---------|-------------|--------------|-----------------|-------------------|----------------------------------------------------------------------------------------------------------------------------------------------------|-------------------------------------|
| 1    |       | 1e-68   | -1.570e+02  | 8.53%        | 4.32%           | 584.9bp (211.6bp) | Mef2d(MADS)/Retina-Mef2d-ChIP-Seq(GSE61391)/Homer(0.968)<br><a href="#">More Information</a>   <a href="#">Similar Motifs Found</a>                | <a href="#">motif file (matrix)</a> |
| 2    |       | 1e-44   | -1.020e+02  | 27.41%       | 21.19%          | 558.1bp (213.3bp) | PB0022.1_Gata5_1/Jaspar(0.945)<br><a href="#">More Information</a>   <a href="#">Similar Motifs Found</a>                                          | <a href="#">motif file (matrix)</a> |
| 3    |       | 1e-26   | -6.163e+01  | 18.00%       | 13.93%          | 542.1bp (218.2bp) | Tbx20(T-box)/Heart-Tbx20-ChIP-Seq(GSE29636)/Homer(0.921)<br><a href="#">More Information</a>   <a href="#">Similar Motifs Found</a>                | <a href="#">motif file (matrix)</a> |
| 4    |       | 1e-22   | -5.259e+01  | 22.74%       | 18.58%          | 540.7bp (221.4bp) | Tlx?(NR)/NPC-H3K4me1-ChIP-Seq(GSE16256)/Homer(0.774)<br><a href="#">More Information</a>   <a href="#">Similar Motifs Found</a>                    | <a href="#">motif file (matrix)</a> |
| 5    |       | 1e-20   | -4.834e+01  | 0.68%        | 0.15%           | 409.5bp (217.5bp) | Tcf21(bHLH)/ArterySmoothMuscle-Tcf21-ChIP-Seq(GSE61369)/Homer(0.577)<br><a href="#">More Information</a>   <a href="#">Similar Motifs Found</a>    | <a href="#">motif file (matrix)</a> |
| 6    |       | 1e-20   | -4.820e+01  | 14.37%       | 11.12%          | 529.2bp (218.9bp) | SMAD2::SMAD3::SMAD4/MA0513.1/Jaspar(0.757)<br><a href="#">More Information</a>   <a href="#">Similar Motifs Found</a>                              | <a href="#">motif file (matrix)</a> |
| 7    |       | 1e-20   | -4.680e+01  | 11.73%       | 8.83%           | 588.8bp (220.3bp) | Tbox:Smad(T-box,MAD)/ESCd5-Smad2_3-ChIP-Seq(GSE29422)/Homer(0.666)<br><a href="#">More Information</a>   <a href="#">Similar Motifs Found</a>      | <a href="#">motif file (matrix)</a> |
| 8    |       | 1e-19   | -4.567e+01  | 8.04%        | 5.67%           | 623.6bp (211.7bp) | Nkx2-5(var.2)/MA0503.1/Jaspar(0.762)<br><a href="#">More Information</a>   <a href="#">Similar Motifs Found</a>                                    | <a href="#">motif file (matrix)</a> |
| 9    |       | 1e-19   | -4.557e+01  | 0.27%        | 0.02%           | 368.3bp (212.1bp) | PH0098.1_Lhx8/Jaspar(0.688)<br><a href="#">More Information</a>   <a href="#">Similar Motifs Found</a>                                             | <a href="#">motif file (matrix)</a> |
| 10   |       | 1e-18   | -4.309e+01  | 5.63%        | 3.72%           | 504.3bp (210.0bp) | ONECUT1/MA0679.1/Jaspar(0.608)<br><a href="#">More Information</a>   <a href="#">Similar Motifs Found</a>                                          | <a href="#">motif file (matrix)</a> |
| 11   |       | 1e-18   | -4.273e+01  | 7.69%        | 5.44%           | 602.2bp (210.5bp) | mix-a/MA0621.1/Jaspar(0.661)<br><a href="#">More Information</a>   <a href="#">Similar Motifs Found</a>                                            | <a href="#">motif file (matrix)</a> |
| 12   |       | 1e-18   | -4.244e+01  | 0.14%        | 0.00%           | 207.4bp (0.0bp)   | ZNF768(Zf)/Rajj-ZNF768-ChIP-Seq(GSE111879)/Homer(0.583)<br><a href="#">More Information</a>   <a href="#">Similar Motifs Found</a>                 | <a href="#">motif file (matrix)</a> |
| 13   |       | 1e-18   | -4.242e+01  | 13.19%       | 10.25%          | 548.3bp (215.0bp) | Esrrb(NR)/mES-Esrrb-ChIP-Seq(GSE11431)/Homer(0.977)<br><a href="#">More Information</a>   <a href="#">Similar Motifs Found</a>                     | <a href="#">motif file (matrix)</a> |
| 14   |       | 1e-18   | -4.171e+01  | 10.99%       | 8.32%           | 605.2bp (210.7bp) | Arid3b/MA0601.1/Jaspar(0.788)<br><a href="#">More Information</a>   <a href="#">Similar Motifs Found</a>                                           | <a href="#">motif file (matrix)</a> |
| 15   |       | 1e-17   | -4.062e+01  | 0.16%        | 0.01%           | 380.3bp (66.6bp)  | STAT3/MA0144.2/Jaspar(0.550)<br><a href="#">More Information</a>   <a href="#">Similar Motifs Found</a>                                            | <a href="#">motif file (matrix)</a> |
| 16   |       | 1e-16   | -3.872e+01  | 23.17%       | 19.58%          | 528.8bp (218.9bp) | TEAD3/MA0808.1/Jaspar(0.773)<br><a href="#">More Information</a>   <a href="#">Similar Motifs Found</a>                                            | <a href="#">motif file (matrix)</a> |
| 17   |       | 1e-16   | -3.836e+01  | 0.13%        | 0.00%           | 275.8bp (6.5bp)   | TBX15/MA0803.1/Jaspar(0.627)<br><a href="#">More Information</a>   <a href="#">Similar Motifs Found</a>                                            | <a href="#">motif file (matrix)</a> |
| 18   |       | 1e-16   | -3.836e+01  | 0.13%        | 0.00%           | 288.9bp (0.0bp)   | GSC(Homeobox)/FrogEmbryos-GSC-ChIP-Seq(DRA000576)/Homer(0.599)<br><a href="#">More Information</a>   <a href="#">Similar Motifs Found</a>          | <a href="#">motif file (matrix)</a> |
| 19   |       | 1e-16   | -3.836e+01  | 0.13%        | 0.00%           | 915.6bp (0.0bp)   | Hoxa10(Homeobox)/ChickenMSG-Hoxa10.Flag-ChIP-Seq(GSE86088)/Homer(0.621)<br><a href="#">More Information</a>   <a href="#">Similar Motifs Found</a> | <a href="#">motif file (matrix)</a> |
| 20   |       | 1e-15   | -3.636e+01  | 17.00%       | 13.95%          | 537.9bp (220.2bp) | Reverb(NR),DR2/RAW-Reverba.biotin-ChIP-Seq(GSE45914)/Homer(0.654)<br><a href="#">More Information</a>   <a href="#">Similar Motifs Found</a>       | <a href="#">motif file (matrix)</a> |
| 21   |       | 1e-15   | -3.572e+01  | 0.20%        | 0.01%           | 461.0bp (180.7bp) | STAT3/MA0144.2/Jaspar(0.804)<br><a href="#">More Information</a>   <a href="#">Similar Motifs Found</a>                                            | <a href="#">motif file (matrix)</a> |

|      |  |       |            |        |        |                      |                                                                                                                                               |                                     |
|------|--|-------|------------|--------|--------|----------------------|-----------------------------------------------------------------------------------------------------------------------------------------------|-------------------------------------|
| 22   |  | 1e-15 | -3.503e+01 | 0.85%  | 0.29%  | 550.6bp<br>(204.1bp) | Tgif2(Homeobox)/mES-Tgif2-ChIP-Seq(GSE55404)/Homer(0.606)<br><a href="#">More Information</a>   <a href="#">Similar Motifs Found</a>          | <a href="#">motif file (matrix)</a> |
| 23   |  | 1e-14 | -3.363e+01 | 0.14%  | 0.01%  | 561.9bp<br>(100.4bp) | PB0063.1_Sox13_1/Jaspar(0.574)<br><a href="#">More Information</a>   <a href="#">Similar Motifs Found</a>                                     | <a href="#">motif file (matrix)</a> |
| 24   |  | 1e-13 | -3.103e+01 | 3.38%  | 2.14%  | 531.3bp<br>(216.3bp) | PH0085.1_Irx4/Jaspar(0.637)<br><a href="#">More Information</a>   <a href="#">Similar Motifs Found</a>                                        | <a href="#">motif file (matrix)</a> |
| 25   |  | 1e-13 | -3.044e+01 | 0.11%  | 0.00%  | 301.6bp<br>(39.3bp)  | SD0003.1_at_AC_acceptor/Jaspar(0.630)<br><a href="#">More Information</a>   <a href="#">Similar Motifs Found</a>                              | <a href="#">motif file (matrix)</a> |
| 26   |  | 1e-13 | -3.044e+01 | 0.11%  | 0.00%  | 457.6bp<br>(0.0bp)   | PB0155.1_Osr2_2/Jaspar(0.607)<br><a href="#">More Information</a>   <a href="#">Similar Motifs Found</a>                                      | <a href="#">motif file (matrix)</a> |
| 27   |  | 1e-13 | -3.024e+01 | 0.13%  | 0.01%  | 473.0bp<br>(195.3bp) | MYNN(Zf)/HEK293-MYNN.eGFP-ChIP-Seq(Encode)/Homer(0.621)<br><a href="#">More Information</a>   <a href="#">Similar Motifs Found</a>            | <a href="#">motif file (matrix)</a> |
| 28   |  | 1e-13 | -3.024e+01 | 0.13%  | 0.01%  | 375.0bp<br>(30.6bp)  | Nkx2-5(var.2)/MA0503.1/Jaspar(0.662)<br><a href="#">More Information</a>   <a href="#">Similar Motifs Found</a>                               | <a href="#">motif file (matrix)</a> |
| 29   |  | 1e-12 | -2.856e+01 | 0.14%  | 0.01%  | 252.3bp<br>(79.5bp)  | ZNF382(Zf)/HEK293-ZNF382.GFP-ChIP-Seq(GSE58341)/Homer(0.622)<br><a href="#">More Information</a>   <a href="#">Similar Motifs Found</a>       | <a href="#">motif file (matrix)</a> |
| 30   |  | 1e-12 | -2.775e+01 | 6.83%  | 5.12%  | 545.8bp<br>(213.6bp) | NKX2-8/MA0673.1/Jaspar(0.880)<br><a href="#">More Information</a>   <a href="#">Similar Motifs Found</a>                                      | <a href="#">motif file (matrix)</a> |
| 31 * |  | 1e-11 | -2.697e+01 | 0.29%  | 0.05%  | 520.4bp<br>(182.7bp) | TFAP4/MA0691.1/Jaspar(0.787)<br><a href="#">More Information</a>   <a href="#">Similar Motifs Found</a>                                       | <a href="#">motif file (matrix)</a> |
| 32 * |  | 1e-11 | -2.697e+01 | 0.29%  | 0.05%  | 365.8bp<br>(209.3bp) | PH0126.1_Obox6/Jaspar(0.636)<br><a href="#">More Information</a>   <a href="#">Similar Motifs Found</a>                                       | <a href="#">motif file (matrix)</a> |
| 33 * |  | 1e-11 | -2.693e+01 | 0.12%  | 0.01%  | 368.0bp<br>(217.0bp) | POU3F1/MA0786.1/Jaspar(0.614)<br><a href="#">More Information</a>   <a href="#">Similar Motifs Found</a>                                      | <a href="#">motif file (matrix)</a> |
| 34 * |  | 1e-11 | -2.693e+01 | 0.12%  | 0.01%  | 267.1bp<br>(278.9bp) | LIN54/MA0619.1/Jaspar(0.588)<br><a href="#">More Information</a>   <a href="#">Similar Motifs Found</a>                                       | <a href="#">motif file (matrix)</a> |
| 35 * |  | 1e-11 | -2.666e+01 | 0.24%  | 0.04%  | 308.4bp<br>(167.0bp) | PB0118.1_Esrra_2/Jaspar(0.603)<br><a href="#">More Information</a>   <a href="#">Similar Motifs Found</a>                                     | <a href="#">motif file (matrix)</a> |
| 36 * |  | 1e-11 | -2.662e+01 | 0.10%  | 0.00%  | 473.2bp<br>(0.0bp)   | Smad2(MAD)/ES-SMAD2-ChIP-Seq(GSE29422)/Homer(0.690)<br><a href="#">More Information</a>   <a href="#">Similar Motifs Found</a>                | <a href="#">motif file (matrix)</a> |
| 37 * |  | 1e-11 | -2.558e+01 | 0.13%  | 0.01%  | 292.3bp<br>(52.7bp)  | PB0025.1_Glis2_1/Jaspar(0.666)<br><a href="#">More Information</a>   <a href="#">Similar Motifs Found</a>                                     | <a href="#">motif file (matrix)</a> |
| 38 * |  | 1e-10 | -2.479e+01 | 15.04% | 12.67% | 548.3bp<br>(211.5bp) | LIN54/MA0619.1/Jaspar(0.707)<br><a href="#">More Information</a>   <a href="#">Similar Motifs Found</a>                                       | <a href="#">motif file (matrix)</a> |
| 39 * |  | 1e-10 | -2.456e+01 | 0.93%  | 0.42%  | 620.9bp<br>(206.0bp) | PB0096.1_Zfp187_1/Jaspar(0.695)<br><a href="#">More Information</a>   <a href="#">Similar Motifs Found</a>                                    | <a href="#">motif file (matrix)</a> |
| 40 * |  | 1e-10 | -2.401e+01 | 0.53%  | 0.17%  | 710.4bp<br>(190.9bp) | TEAD4/MA0809.1/Jaspar(0.709)<br><a href="#">More Information</a>   <a href="#">Similar Motifs Found</a>                                       | <a href="#">motif file (matrix)</a> |
| 41 * |  | 1e-10 | -2.371e+01 | 0.11%  | 0.01%  | 258.8bp<br>(1.6bp)   | SCL(bHLH)/HPC7-Scl-ChIP-Seq(GSE13511)/Homer(0.610)<br><a href="#">More Information</a>   <a href="#">Similar Motifs Found</a>                 | <a href="#">motif file (matrix)</a> |
| 42 * |  | 1e-9  | -2.253e+01 | 0.15%  | 0.02%  | 323.7bp<br>(183.4bp) | SIX2/MA1119.1/Jaspar(0.692)<br><a href="#">More Information</a>   <a href="#">Similar Motifs Found</a>                                        | <a href="#">motif file (matrix)</a> |
| 43 * |  | 1e-8  | -2.058e+01 | 0.10%  | 0.01%  | 270.0bp<br>(216.4bp) | PB0169.1_Sox15_2/Jaspar(0.690)<br><a href="#">More Information</a>   <a href="#">Similar Motifs Found</a>                                     | <a href="#">motif file (matrix)</a> |
| 44 * |  | 1e-8  | -2.058e+01 | 0.10%  | 0.01%  | 457.8bp<br>(137.8bp) | ZNF354C/MA0130.1/Jaspar(0.616)<br><a href="#">More Information</a>   <a href="#">Similar Motifs Found</a>                                     | <a href="#">motif file (matrix)</a> |
| 45 * |  | 1e-8  | -2.058e+01 | 0.10%  | 0.01%  | 103.4bp<br>(160.1bp) | PH0084.1_Irx3_2/Jaspar(0.587)<br><a href="#">More Information</a>   <a href="#">Similar Motifs Found</a>                                      | <a href="#">motif file (matrix)</a> |
| 46 * |  | 1e-8  | -2.058e+01 | 0.10%  | 0.01%  | 438.7bp<br>(105.4bp) | Tbox:Smad(T-box,MAD)/ESCd5-Smad2_3-ChIP-Seq(GSE29422)/Homer(0.696)<br><a href="#">More Information</a>   <a href="#">Similar Motifs Found</a> | <a href="#">motif file (matrix)</a> |

|      |  |      |            |        |        |                      |                                                                                                                                   |                                     |
|------|--|------|------------|--------|--------|----------------------|-----------------------------------------------------------------------------------------------------------------------------------|-------------------------------------|
| 47 * |  | 1e-8 | -2.058e+01 | 0.10%  | 0.01%  | 341.5bp<br>(243.6bp) | SPDEF(ETS)/VCaP-SPDEF-ChIP-Seq(SRA014231)/Homer(0.666)<br><a href="#">More Information</a>   <a href="#">Similar Motifs Found</a> | <a href="#">motif file (matrix)</a> |
| 48 * |  | 1e-8 | -1.950e+01 | 0.22%  | 0.04%  | 333.5bp<br>(198.7bp) | Sox3/MA0514.1/Jaspar(0.648)<br><a href="#">More Information</a>   <a href="#">Similar Motifs Found</a>                            | <a href="#">motif file (matrix)</a> |
| 49 * |  | 1e-8 | -1.931e+01 | 0.08%  | 0.00%  | 233.2bp<br>(9.7bp)   | Smad4/MA1153.1/Jaspar(0.661)<br><a href="#">More Information</a>   <a href="#">Similar Motifs Found</a>                           | <a href="#">motif file (matrix)</a> |
| 50 * |  | 1e-7 | -1.839e+01 | 1.99%  | 1.28%  | 508.3bp<br>(199.3bp) | PB0091.1_Zbtb3_1/Jaspar(0.706)<br><a href="#">More Information</a>   <a href="#">Similar Motifs Found</a>                         | <a href="#">motif file (matrix)</a> |
| 51 * |  | 1e-7 | -1.756e+01 | 0.09%  | 0.01%  | 224.6bp<br>(125.3bp) | PH0078.1_Hoxd13/Jaspar(0.622)<br><a href="#">More Information</a>   <a href="#">Similar Motifs Found</a>                          | <a href="#">motif file (matrix)</a> |
| 52 * |  | 1e-7 | -1.729e+01 | 0.73%  | 0.34%  | 413.8bp<br>(191.1bp) | SD0003.1_at_AC_acceptor/Jaspar(0.708)<br><a href="#">More Information</a>   <a href="#">Similar Motifs Found</a>                  | <a href="#">motif file (matrix)</a> |
| 53 * |  | 1e-6 | -1.474e+01 | 0.10%  | 0.01%  | 416.1bp<br>(147.5bp) | PB0201.1_Zfp281_2/Jaspar(0.670)<br><a href="#">More Information</a>   <a href="#">Similar Motifs Found</a>                        | <a href="#">motif file (matrix)</a> |
| 54 * |  | 1e-6 | -1.465e+01 | 0.08%  | 0.01%  | 540.9bp<br>(187.7bp) | PB0178.1_Sox8_2/Jaspar(0.756)<br><a href="#">More Information</a>   <a href="#">Similar Motifs Found</a>                          | <a href="#">motif file (matrix)</a> |
| 55 * |  | 1e-6 | -1.465e+01 | 0.08%  | 0.01%  | 318.8bp<br>(222.9bp) | PB0143.1_Klf7_2/Jaspar(0.649)<br><a href="#">More Information</a>   <a href="#">Similar Motifs Found</a>                          | <a href="#">motif file (matrix)</a> |
| 56 * |  | 1e-6 | -1.465e+01 | 0.08%  | 0.01%  | 238.8bp<br>(0.0bp)   | ZFX(Zf)/mES-Zfx-ChIP-Seq(GSE11431)/Homer(0.720)<br><a href="#">More Information</a>   <a href="#">Similar Motifs Found</a>        | <a href="#">motif file (matrix)</a> |
| 57 * |  | 1e-6 | -1.451e+01 | 0.09%  | 0.01%  | 457.8bp<br>(125.9bp) | JUN::JUNB(var.2)/MA1133.1/Jaspar(0.654)<br><a href="#">More Information</a>   <a href="#">Similar Motifs Found</a>                | <a href="#">motif file (matrix)</a> |
| 58 * |  | 1e-6 | -1.451e+01 | 0.09%  | 0.01%  | 343.7bp<br>(51.3bp)  | PB0148.1_Mtf1_2/Jaspar(0.665)<br><a href="#">More Information</a>   <a href="#">Similar Motifs Found</a>                          | <a href="#">motif file (matrix)</a> |
| 59 * |  | 1e-4 | -1.043e+01 | 15.48% | 14.00% | 570.6bp<br>(211.1bp) | ONECUT3/MA0757.1/Jaspar(0.685)<br><a href="#">More Information</a>   <a href="#">Similar Motifs Found</a>                         | <a href="#">motif file (matrix)</a> |
